# Supplementary material for: Allogenic Faecal Microbiota Transfer Induces Immune-Related Gene Sets in the Colon Mucosa of Patients with Irritable Bowel Syndrome
Source: MDPI journal article supplement (doi:10.3390/biom9100586), 2019-10-08
Supplement: s2 [file s2]

# **Allogenic faecal microbiota transfer induces immune-related gene sets in the colon mucosa of patients with irritable bowel syndrome**

**Savanne Holster<sup>1</sup>, Guido J. Hooiveld<sup>2</sup>, Dirk Repsilber<sup>1</sup>, Willem M. de Vos<sup>3,4</sup>, Robert J. Brummer<sup>1</sup> and Julia König<sup>1,\*</sup>**

<sup>1</sup> Nutrition-Gut-Brain Interactions Research Centre, Faculty of Health and Medicine, School of Medical Sciences, Örebro University, 701 82 Örebro, Sweden

<sup>2</sup> Nutrition, Metabolism and Genomics group, Division of Human Nutrition and Health, Wageningen University, 6708 PB Wageningen, The Netherlands

<sup>3</sup> Laboratory of Microbiology, Wageningen University and Research Centre, 6708 PB Wageningen, The Netherlands

<sup>4</sup> Human Microbiome Research Program, Faculty of Medicine, University of Helsinki, 00014 Helsinki, Finland

**Table S1: Differentially expressed genes two weeks after allogenic FMT compared to baseline.** Genes with a fold change >1.5 and < -1.5 and p<0.005 are shown.

| Upregulated  |             |         |       | Downregulated |             |         |       |
|--------------|-------------|---------|-------|---------------|-------------|---------|-------|
| Gene name    | Fold change | p-value | FDR   | Gene name     | Fold change | p-value | FDR   |
| MFAP5        | 1.5         | 0.0021  | 0.509 | SNORA3B       | -2.3        | 0.0007  | 0.465 |
| PIM2         | 1.5         | 0.0000  | 0.054 | ZNF695        | -1.7        | 0.0004  | 0.435 |
| IGHV3-73     | 1.5         | 0.0034  | 0.542 | LOC107984255  | -1.6        | 0.0004  | 0.435 |
| IGLV9-49     | 1.5         | 0.0034  | 0.542 | SNORD65       | -1.6        | 0.0014  | 0.484 |
| LOC107986494 | 1.5         | 0.0015  | 0.484 | MIR2276       | -1.6        | 0.0009  | 0.467 |
| LINC02499    | 1.5         | 0.0011  | 0.484 | SNORA75       | -1.6        | 0.0033  | 0.542 |
| TPSB2        | 1.5         | 0.0000  | 0.410 | SCARNA16      | -1.6        | 0.0038  | 0.547 |
| IGHV5-51     | 1.6         | 0.0030  | 0.542 | OR5L2         | -1.5        | 0.0006  | 0.465 |
| SNHG28       | 1.6         | 0.0017  | 0.484 | SNORD15A      | -1.5        | 0.0003  | 0.435 |
| IGLV3-1      | 1.6         | 0.0023  | 0.527 | SCARNA8       | -1.5        | 0.0005  | 0.465 |
| NA           | 1.6         | 0.0029  | 0.542 | LOC105378235  | -1.5        | 0.0011  | 0.484 |
| TRGV10       | 1.7         | 0.0005  | 0.436 | LOC105378177  | -1.5        | 0.0034  | 0.542 |
| ZIM2         | 1.7         | 0.0003  | 0.435 | LINC01811     | -1.5        | 0.0004  | 0.435 |
| LOC105372651 | 1.7         | 0.0043  | 0.560 |               |             |         |       |
| IGLV1-44     | 1.7         | 0.0044  | 0.560 |               |             |         |       |
| LOC107985535 | 1.7         | 0.0011  | 0.484 |               |             |         |       |
| IGHV1-18     | 1.9         | 0.0021  | 0.511 |               |             |         |       |

*No individual genes were significantly differentially expressed (FDR<0.05). FDR- False discovery rate.*

**Table S2: Differentially expressed genes eight weeks after allogenic FMT compared to baseline.**  
Genes with a fold change >1.5 and < -1.5 and p<0.005 are shown.

| Upregulated  |              |         |       | Downregulated |              |         |       |
|--------------|--------------|---------|-------|---------------|--------------|---------|-------|
| Gene name    | Fold changes | p-value | FDR   | Gene name     | Fold changes | p-value | FDR   |
| LINC00537    | 1.5          | 0.0019  | 0.976 | LOC105369187  | -2.2         | 0.0003  | 0.696 |
| LINC01563    | 1.6          | 0.0000  | 0.293 | LOC107985377  | -2.1         | 0.0002  | 0.631 |
| CST9LP1      | 1.6          | 0.0029  | 0.976 | KRT8          | -2.0         | 0.0017  | 0.976 |
| ALG10B       | 1.7          | 0.0014  | 0.976 | RPL39L        | -1.9         | 0.0001  | 0.480 |
| LOC105372255 | 1.7          | 0.0029  | 0.976 | C9orf106      | -1.7         | 0.0024  | 0.976 |
| SPAG5-AS1    | 1.8          | 0.0016  | 0.976 | ZNF695        | -1.7         | 0.0004  | 0.840 |
| LY6G6F       | 1.8          | 0.0011  | 0.976 | LOC101927960  | -1.7         | 0.0048  | 0.976 |
|              |              |         |       | LAGE3         | -1.7         | 0.0017  | 0.976 |
|              |              |         |       | SCARNA11      | -1.6         | 0.0026  | 0.976 |
|              |              |         |       | SCNM1         | -1.5         | 0.0046  | 0.976 |
|              |              |         |       | TUBA4A        | -1.5         | 0.0033  | 0.976 |
|              |              |         |       | CHRNA5        | -1.5         | 0.0006  | 0.915 |

*No individual genes were significantly differentially expressed (FDR<0.05). FDR- False discovery rate.*

**Table S3: Differentially expressed genes two weeks after autologous FMT compared to baseline.**  
Genes with a fold change >1.5 and < -1.5 and p<0.005 are shown.

| Upregulated  |              |         |       | Downregulated |              |         |       |
|--------------|--------------|---------|-------|---------------|--------------|---------|-------|
| Gene name    | Fold changes | p-value | FDR   | Gene name     | Fold changes | p-value | FDR   |
| CYP2C18      | 1.5          | 0.0048  | 0.395 | RNA5SP99      | -3.1         | 0.0011  | 0.310 |
| LOC112268420 | 1.5          | 0.0011  | 0.310 | LOC105369864  | -2.1         | 0.0022  | 0.345 |
| ANKRD34C-AS1 | 1.5          | 0.0036  | 0.364 | SNORA35B      | -2.0         | 0.0043  | 0.371 |
| LINC02525    | 1.5          | 0.0006  | 0.310 | MIR4774       | -1.9         | 0.0006  | 0.310 |
| CEACAM6      | 1.5          | 0.0000  | 0.273 | HPF1          | -1.9         | 0.0001  | 0.273 |
| LOC105378093 | 1.6          | 0.0036  | 0.364 | SNORA31       | -1.9         | 0.0009  | 0.310 |
| LGALS9C      | 1.6          | 0.0001  | 0.273 | LINC02384     | -1.8         | 0.0039  | 0.369 |
| LOC105375896 | 1.6          | 0.0026  | 0.353 | CLEC17A       | -1.8         | 0.0028  | 0.353 |
| TFF1         | 1.6          | 0.0002  | 0.298 | RNU6-431P     | -1.8         | 0.0003  | 0.301 |
| ABHD17A      | 1.6          | 0.0010  | 0.310 | BTLA          | -1.8         | 0.0001  | 0.291 |
| MIR1237      | 1.7          | 0.0007  | 0.310 | TRBV20-1      | -1.8         | 0.0045  | 0.380 |
| MIR516A2     | 1.7          | 0.0023  | 0.345 | SNORA18       | -1.7         | 0.0002  | 0.298 |
| CLEC18C      | 1.7          | 0.0022  | 0.345 | LINC02211     | -1.7         | 0.0027  | 0.353 |
| LOC107984574 | 1.7          | 0.0005  | 0.310 | PPP1R16B      | -1.7         | 0.0002  | 0.298 |
| MIR4427      | 1.9          | 0.0013  | 0.314 | KIF5C         | -1.7         | 0.0023  | 0.350 |
| ZNF705G      | 2.0          | 0.0006  | 0.310 | LOC105374318  | -1.7         | 0.0001  | 0.273 |
|              |              |         |       | KRTAP9-4      | -1.7         | 0.0016  | 0.330 |
|              |              |         |       | TAS2R20       | -1.6         | 0.0012  | 0.310 |
|              |              |         |       | SLAMF1        | -1.6         | 0.0006  | 0.310 |
|              |              |         |       | TRAJ27        | -1.6         | 0.0018  | 0.343 |
|              |              |         |       | MIR2276       | -1.6         | 0.0018  | 0.343 |
|              |              |         |       | SNORA50A      | -1.6         | 0.0009  | 0.310 |
|              |              |         |       | SNORD90       | -1.6         | 0.0004  | 0.310 |
|              |              |         |       | C7            | -1.6         | 0.0018  | 0.343 |
|              |              |         |       | SNORA26       | -1.6         | 0.0032  | 0.357 |
|              |              |         |       | LOC107984034  | -1.6         | 0.0022  | 0.345 |
|              |              |         |       | MIR3145       | -1.6         | 0.0029  | 0.353 |
|              |              |         |       | SNORD102      | -1.6         | 0.0006  | 0.310 |
|              |              |         |       | SCARNA18      | -1.5         | 0.0037  | 0.364 |
|              |              |         |       | SNORD19C      | -1.5         | 0.0010  | 0.310 |
|              |              |         |       | SNORD31       | -1.5         | 0.0003  | 0.301 |
|              |              |         |       | SNORA79       | -1.5         | 0.0003  | 0.301 |
|              |              |         |       | SNORD9        | -1.5         | 0.0023  | 0.345 |
|              |              |         |       | SNORD3K       | -1.5         | 0.0042  | 0.371 |
|              |              |         |       | LOC105372733  | -1.5         | 0.0015  | 0.317 |
|              |              |         |       | LOC105377901  | -1.5         | 0.0014  | 0.317 |

*No individual genes were significantly differentially expressed (FDR<0.05). FDR- False discovery rate.*

**Table S4: Differentially expressed genes eight weeks after autologous FMT compared to baseline.**  
Genes with a fold change >1.5 and < -1.5 and p<0.005 are shown.

| Upregulated  |              |         |       | Downregulated |              |         |       |
|--------------|--------------|---------|-------|---------------|--------------|---------|-------|
| Gene name    | Fold changes | p-value | FDR   | Gene name     | Fold changes | p-value | FDR   |
| ABHD17A      | 1.5          | 0.0046  | 0.198 | LOC105369151  | -2.4         | 0.0002  | 0.064 |
| LRRC26       | 1.5          | 0.0014  | 0.123 | TRAJ16        | -2.4         | 0.0009  | 0.112 |
| LOC339260    | 1.5          | 0.0003  | 0.080 | IGLV1-47      | -2.4         | 0.0024  | 0.155 |
| ZNF443       | 1.5          | 0.0011  | 0.116 | TRAJ19        | -2.2         | 0.0004  | 0.088 |
| PRSS53       | 1.5          | 0.0016  | 0.132 | RNY1P11       | -2.2         | 0.0000  | 0.039 |
| FAM21EP      | 1.5          | 0.0036  | 0.179 | IGLV3-21      | -2.1         | 0.0000  | 0.039 |
| RAB6C        | 1.5          | 0.0047  | 0.199 | LOC107986275  | -2.1         | 0.0000  | 0.026 |
| LOC101929976 | 1.5          | 0.0018  | 0.139 | DEFB108B      | -2.0         | 0.0024  | 0.155 |
| LOC100996643 | 1.5          | 0.0031  | 0.170 | POU2AF1       | -1.9         | 0.0001  | 0.050 |
| PCAT6        | 1.5          | 0.0015  | 0.130 | TRGV2         | -1.9         | 0.0002  | 0.064 |
| ANKRD34C-AS1 | 1.5          | 0.0027  | 0.164 | SNORA3A       | -1.9         | 0.0045  | 0.196 |
| TMEM150B     | 1.5          | 0.0004  | 0.085 | IGKV6-21      | -1.9         | 0.0035  | 0.179 |
| MIR25        | 1.5          | 0.0013  | 0.123 | TRAJ14        | -1.9         | 0.0035  | 0.178 |
| TPSG1        | 1.5          | 0.0000  | 0.039 | TRAT1         | -1.9         | 0.0002  | 0.064 |
| LOC105371044 | 1.6          | 0.0040  | 0.185 | FAM30A        | -1.9         | 0.0001  | 0.050 |
| MIR3190      | 1.6          | 0.0012  | 0.120 | ITK           | -1.9         | 0.0000  | 0.037 |
| HAVCR1       | 1.6          | 0.0010  | 0.113 | TRAJ10        | -1.9         | 0.0002  | 0.064 |
| OR6B1        | 1.6          | 0.0017  | 0.137 | TRAJ38        | -1.8         | 0.0014  | 0.124 |
| CLEC18C      | 1.6          | 0.0046  | 0.198 | LOC105371932  | -1.8         | 0.0000  | 0.039 |
| CYP2C18      | 1.6          | 0.0009  | 0.112 | IGLV3-25      | -1.8         | 0.0003  | 0.080 |
| LOC101927093 | 1.7          | 0.0022  | 0.151 | LINC02211     | -1.8         | 0.0005  | 0.094 |
| LOC105370700 | 1.7          | 0.0014  | 0.125 | BTLA          | -1.8         | 0.0001  | 0.045 |
| ACY3         | 1.7          | 0.0000  | 0.012 | MIR4774       | -1.8         | 0.0013  | 0.123 |
| MIR4746      | 1.7          | 0.0034  | 0.177 | IGKV3-11      | -1.8         | 0.0001  | 0.050 |
| OVCA2        | 1.8          | 0.0044  | 0.196 | STAP1         | -1.8         | 0.0014  | 0.124 |
| LOC105378835 | 1.8          | 0.0009  | 0.112 | TRAJ27        | -1.8         | 0.0002  | 0.064 |
| TRIM29       | 1.8          | 0.0001  | 0.053 | SNORA23       | -1.8         | 0.0038  | 0.185 |
| GOLGA6L17P   | 1.8          | 0.0018  | 0.139 | SLAMF1        | -1.8         | 0.0001  | 0.045 |
| LOC107983959 | 1.9          | 0.0009  | 0.112 | PPP1R16B      | -1.8         | 0.0000  | 0.039 |
| LOC644277    | 1.9          | 0.0034  | 0.177 | GPR15         | -1.8         | 0.0000  | 0.012 |
| LOC107985377 | 1.9          | 0.0009  | 0.112 | IGKV4-1       | -1.8         | 0.0000  | 0.012 |
| LOC105374334 | 1.9          | 0.0020  | 0.145 | IGLV1-40      | -1.7         | 0.0002  | 0.068 |
| LINC01080    | 1.9          | 0.0005  | 0.092 | CHIT1         | -1.7         | 0.0030  | 0.169 |
| TFF1         | 2.0          | 0.0000  | 0.012 | IGLV6-57      | -1.7         | 0.0004  | 0.085 |
| REG4         | 2.7          | 0.0000  | 0.039 | GPR171        | -1.7         | 0.0001  | 0.054 |
| SPINK4       | 3.3          | 0.0002  | 0.071 | LOC400464     | -1.7         | 0.0002  | 0.072 |
| OLFM4        | 3.5          | 0.0003  | 0.080 | FCRL5         | -1.7         | 0.0024  | 0.155 |
|              |              |         |       | SCARNA18      | -1.7         | 0.0003  | 0.080 |
|              |              |         |       | SNORA31       | -1.7         | 0.0024  | 0.155 |
|              |              |         |       | TRAV8-4       | -1.7         | 0.0005  | 0.090 |
|              |              |         |       | TRAJ34        | -1.7         | 0.0036  | 0.179 |
|              |              |         |       | TRBV30        | -1.7         | 0.0032  | 0.172 |
|              |              |         |       | PTPRC         | -1.7         | 0.0002  | 0.064 |
|              |              |         |       | IGHV3-72      | -1.7         | 0.0000  | 0.043 |
|              |              |         |       | TRAJ36        | -1.7         | 0.0011  | 0.116 |
|              |              |         |       | TRAJ35        | -1.7         | 0.0008  | 0.110 |
|              |              |         |       | CD38          | -1.7         | 0.0002  | 0.072 |
|              |              |         |       | IGKV1-5       | -1.7         | 0.0003  | 0.084 |
|              |              |         |       | CD96          | -1.7         | 0.0001  | 0.050 |
|              |              |         |       | TRAJ21        | -1.7         | 0.0010  | 0.116 |

|  |  |  |  |              |      |        |       |
|--|--|--|--|--------------|------|--------|-------|
|  |  |  |  | IGHG4        | -1.7 | 0.0010 | 0.114 |
|  |  |  |  | FCRL4        | -1.7 | 0.0035 | 0.178 |
|  |  |  |  | IKZF3        | -1.7 | 0.0012 | 0.119 |
|  |  |  |  | SCARNA1      | -1.6 | 0.0029 | 0.166 |
|  |  |  |  | RHOH         | -1.6 | 0.0009 | 0.112 |
|  |  |  |  | TRAJ30       | -1.6 | 0.0025 | 0.160 |
|  |  |  |  | SNORA50A     | -1.6 | 0.0004 | 0.088 |
|  |  |  |  | TNFRSF17     | -1.6 | 0.0001 | 0.050 |
|  |  |  |  | IGKV3-7      | -1.6 | 0.0001 | 0.061 |
|  |  |  |  | EVI2A        | -1.6 | 0.0001 | 0.050 |
|  |  |  |  | TRAJ20       | -1.6 | 0.0015 | 0.130 |
|  |  |  |  | SNORD3K      | -1.6 | 0.0010 | 0.114 |
|  |  |  |  | CGB8         | -1.6 | 0.0049 | 0.203 |
|  |  |  |  | LRRC37B      | -1.6 | 0.0013 | 0.122 |
|  |  |  |  | IGKV1-17     | -1.6 | 0.0000 | 0.037 |
|  |  |  |  | CD69         | -1.6 | 0.0021 | 0.147 |
|  |  |  |  | SNORD115-32  | -1.6 | 0.0021 | 0.147 |
|  |  |  |  | RNY1P13      | -1.6 | 0.0036 | 0.179 |
|  |  |  |  | GCSAM        | -1.6 | 0.0009 | 0.112 |
|  |  |  |  | TRAJ41       | -1.6 | 0.0015 | 0.130 |
|  |  |  |  | IGHV3-15     | -1.6 | 0.0000 | 0.039 |
|  |  |  |  | LOC101928354 | -1.6 | 0.0039 | 0.185 |
|  |  |  |  | RNU4ATAC     | -1.6 | 0.0024 | 0.155 |
|  |  |  |  | KHDRBS2      | -1.6 | 0.0000 | 0.039 |
|  |  |  |  | RUNX1-IT1    | -1.6 | 0.0019 | 0.141 |
|  |  |  |  | KLRB1        | -1.6 | 0.0011 | 0.116 |
|  |  |  |  | LAX1         | -1.6 | 0.0002 | 0.064 |
|  |  |  |  | SNORA18      | -1.6 | 0.0009 | 0.112 |
|  |  |  |  | IKZF1        | -1.6 | 0.0016 | 0.133 |
|  |  |  |  | TRBC2        | -1.6 | 0.0027 | 0.164 |
|  |  |  |  | IGKV3-15     | -1.6 | 0.0034 | 0.176 |
|  |  |  |  | TIFAB        | -1.6 | 0.0006 | 0.101 |
|  |  |  |  | LOC101929272 | -1.6 | 0.0002 | 0.072 |
|  |  |  |  | CD48         | -1.6 | 0.0012 | 0.122 |
|  |  |  |  | CD180        | -1.6 | 0.0038 | 0.185 |
|  |  |  |  | TRAJ47       | -1.6 | 0.0040 | 0.185 |
|  |  |  |  | IGKV1-27     | -1.5 | 0.0028 | 0.164 |
|  |  |  |  | TAS2R19      | -1.5 | 0.0012 | 0.119 |
|  |  |  |  | LOC107985224 | -1.5 | 0.0016 | 0.132 |
|  |  |  |  | LOC105378235 | -1.5 | 0.0016 | 0.134 |
|  |  |  |  | CCDC69       | -1.5 | 0.0000 | 0.038 |
|  |  |  |  | MIR4742      | -1.5 | 0.0004 | 0.087 |
|  |  |  |  | IGLV8-61     | -1.5 | 0.0016 | 0.133 |
|  |  |  |  | MIR4755      | -1.5 | 0.0040 | 0.185 |
|  |  |  |  | TRAJ6        | -1.5 | 0.0044 | 0.196 |
|  |  |  |  | GPR65        | -1.5 | 0.0003 | 0.084 |
|  |  |  |  | SNORD111     | -1.5 | 0.0001 | 0.061 |
|  |  |  |  | LRRN3        | -1.5 | 0.0004 | 0.087 |
|  |  |  |  | ST8SIA4      | -1.5 | 0.0001 | 0.050 |
|  |  |  |  | IGKJ3        | -1.5 | 0.0001 | 0.064 |
|  |  |  |  | ITGB7        | -1.5 | 0.0001 | 0.061 |
|  |  |  |  | RASSF2       | -1.5 | 0.0002 | 0.064 |
|  |  |  |  | LILRB4       | -1.5 | 0.0018 | 0.139 |
|  |  |  |  | ARHGAP15     | -1.5 | 0.0001 | 0.061 |
|  |  |  |  | EMB          | -1.5 | 0.0002 | 0.064 |

|  |  |  |  |           |      |        |       |
|--|--|--|--|-----------|------|--------|-------|
|  |  |  |  | CD53      | -1.5 | 0.0011 | 0.116 |
|  |  |  |  | ZMAT1     | -1.5 | 0.0018 | 0.138 |
|  |  |  |  | CD226     | -1.5 | 0.0002 | 0.064 |
|  |  |  |  | MRPL42P5  | -1.5 | 0.0031 | 0.170 |
|  |  |  |  | LOC374443 | -1.5 | 0.0010 | 0.113 |
|  |  |  |  | SNRPA1    | -1.5 | 0.0031 | 0.170 |

*No individual genes were significantly differentially expressed (FDR<0.05). FDR- False discovery rate.*

**Table S5: Significantly differentially expressed genes after multiple testing eight weeks after autologous FMT compared to baseline.** Genes with a fold change >1.5 and < -1.5 and FDR<0.05 are shown.

| Upregulated |              |         |       | Downregulated |             |         |       |
|-------------|--------------|---------|-------|---------------|-------------|---------|-------|
| Gene name   | Fold changes | p-value | FDR   | Gene name     | Fold change | p-value | FDR   |
| TPSG1       | 1.5          | 0.0000  | 0.039 | RNY1P11       | -2.2        | 0.0000  | 0.039 |
| ACY3        | 1.7          | 0.0000  | 0.012 | IGLV3-21      | -2.1        | 0.0000  | 0.039 |
| TFF1        | 2.0          | 0.0000  | 0.012 | LOC107986275  | -2.1        | 0.0000  | 0.026 |
| REG4        | 2.7          | 0.0000  | 0.039 | POU2AF1       | -1.9        | 0.0001  | 0.050 |
|             |              |         |       | FAM30A        | -1.9        | 0.0001  | 0.050 |
|             |              |         |       | ITK           | -1.9        | 0.0000  | 0.037 |
|             |              |         |       | LOC105371932  | -1.8        | 0.0000  | 0.039 |
|             |              |         |       | BTLA          | -1.8        | 0.0001  | 0.045 |
|             |              |         |       | IGKV3-11      | -1.8        | 0.0001  | 0.050 |
|             |              |         |       | SLAMF1        | -1.8        | 0.0001  | 0.045 |
|             |              |         |       | PPP1R16B      | -1.8        | 0.0000  | 0.039 |
|             |              |         |       | GPR15         | -1.8        | 0.0000  | 0.012 |
|             |              |         |       | IGKV4-1       | -1.8        | 0.0000  | 0.012 |
|             |              |         |       | IGHV3-72      | -1.7        | 0.0000  | 0.043 |
|             |              |         |       | CD96          | -1.7        | 0.0001  | 0.050 |
|             |              |         |       | TNFRSF17      | -1.6        | 0.0001  | 0.050 |
|             |              |         |       | EVI2A         | -1.6        | 0.0001  | 0.050 |
|             |              |         |       | IGKV1-17      | -1.6        | 0.0000  | 0.037 |
|             |              |         |       | IGHV3-15      | -1.6        | 0.0000  | 0.039 |
|             |              |         |       | KHDRBS2       | -1.6        | 0.0000  | 0.039 |
|             |              |         |       | CCDC69        | -1.5        | 0.0000  | 0.038 |
|             |              |         |       | ST8SIA4       | -1.5        | 0.0001  | 0.050 |

*Genes with an FDR<0.05 were considered to be significantly differentially expressed. FDR – False Discovery Rate*



**Table S6: Differentially expressed genes when comparing the allogenic group to the autologous group two weeks after FMT (baseline-corrected).** Genes with a fold change >1.5 and < -1.5 and p<0.005 are shown.

| Increased    |              |         |       | Decreased    |              |         |       |
|--------------|--------------|---------|-------|--------------|--------------|---------|-------|
| Gene name    | Fold changes | p-value | FDR   | Gene name    | Fold changes | p-value | FDR   |
| LOC105369623 | 1.5          | 0.005   | 0.484 | ADAMTS7P1    | -2.3         | 0.004   | 0.476 |
| PIM2         | 1.5          | 0.001   | 0.437 | CCL27        | -2.2         | 0.003   | 0.458 |
| MAGEH1       | 1.5          | 0.003   | 0.463 | ANKRD34C-AS1 | -2.1         | 0.000   | 0.430 |
| LOC100507557 | 1.5          | 0.003   | 0.463 | LOC105375368 | -2.0         | 0.002   | 0.437 |
| BRD3OS       | 1.5          | 0.002   | 0.437 | LOC105378093 | -2.0         | 0.002   | 0.437 |
| ZKSCAN3      | 1.5          | 0.002   | 0.437 | HSFX4        | -2.0         | 0.004   | 0.463 |
| RPS15AP10    | 1.5          | 0.001   | 0.437 | LINC01811    | -1.9         | 0.000   | 0.430 |
| IGKV1-17     | 1.5          | 0.002   | 0.437 | LOC105369199 | -1.9         | 0.001   | 0.437 |
| LOC105375079 | 1.5          | 0.004   | 0.463 | TFF1         | -1.9         | 0.000   | 0.430 |
| ST8SIA4      | 1.5          | 0.003   | 0.443 | LOC107984574 | -1.8         | 0.004   | 0.463 |
| EAF2         | 1.5          | 0.004   | 0.463 | C8orf76      | -1.8         | 0.004   | 0.476 |
| MS4A7        | 1.5          | 0.001   | 0.437 | LGALS9C      | -1.8         | 0.000   | 0.430 |
| CD27         | 1.5          | 0.003   | 0.463 | DHRS9        | -1.8         | 0.002   | 0.437 |
| PDE1B        | 1.5          | 0.003   | 0.456 | LINC02073    | -1.8         | 0.002   | 0.437 |
| GPR15        | 1.5          | 0.003   | 0.451 | LOC105375577 | -1.7         | 0.001   | 0.437 |
| NYX          | 1.5          | 0.004   | 0.463 | OR2G6        | -1.7         | 0.000   | 0.430 |
| AFF3         | 1.5          | 0.004   | 0.463 | ERVH48-1     | -1.7         | 0.004   | 0.463 |
| DDX28        | 1.5          | 0.000   | 0.430 | PRODH        | -1.7         | 0.001   | 0.437 |
| SORCS1       | 1.5          | 0.002   | 0.437 | LOC105378662 | -1.7         | 0.001   | 0.436 |
| MANEA        | 1.5          | 0.000   | 0.430 | CYP1B1-AS1   | -1.7         | 0.004   | 0.463 |
| LYPD3        | 1.5          | 0.002   | 0.437 | FRG2DP       | -1.7         | 0.001   | 0.437 |
| ALDH1A3      | 1.5          | 0.002   | 0.437 | LINC02393    | -1.7         | 0.001   | 0.437 |
| OR4B1        | 1.6          | 0.001   | 0.437 | PROB1        | -1.7         | 0.002   | 0.437 |
| CDK14        | 1.6          | 0.003   | 0.463 | PEBP4        | -1.7         | 0.001   | 0.437 |
| C11orf53     | 1.6          | 0.001   | 0.437 | MIR200A      | -1.7         | 0.001   | 0.437 |
| LOC101927516 | 1.6          | 0.003   | 0.443 | LOC102723548 | -1.7         | 0.000   | 0.430 |
| MIR577       | 1.6          | 0.003   | 0.442 | ESPNP        | -1.7         | 0.001   | 0.437 |
| SERPINI1     | 1.6          | 0.003   | 0.442 | CEACAM6      | -1.7         | 0.000   | 0.430 |
| NCKAP1L      | 1.6          | 0.002   | 0.437 | LINC01143    | -1.6         | 0.001   | 0.437 |
| TPSB2        | 1.6          | 0.002   | 0.437 | CBY3         | -1.6         | 0.001   | 0.437 |
| RASGRP1      | 1.6          | 0.002   | 0.437 | MTCL1        | -1.6         | 0.003   | 0.443 |
| EMB          | 1.6          | 0.002   | 0.437 | LINC00029    | -1.6         | 0.004   | 0.470 |
| IPCEF1       | 1.6          | 0.003   | 0.442 | HPCAL4       | -1.6         | 0.002   | 0.437 |
| RASSF2       | 1.6          | 0.002   | 0.437 | HBE1         | -1.6         | 0.005   | 0.484 |
| KLRD1        | 1.6          | 0.001   | 0.437 | PCAT29       | -1.6         | 0.002   | 0.437 |
| LAPTM5       | 1.6          | 0.002   | 0.437 | YY2          | -1.6         | 0.004   | 0.463 |
| GPR65        | 1.6          | 0.003   | 0.451 | LOC105376433 | -1.6         | 0.003   | 0.442 |
| RRP7BP       | 1.6          | 0.003   | 0.463 | TRIM9        | -1.6         | 0.002   | 0.437 |
| CD226        | 1.6          | 0.001   | 0.437 | TMEM150B     | -1.6         | 0.004   | 0.463 |
| GNB4         | 1.6          | 0.002   | 0.437 | LINC02369    | -1.6         | 0.005   | 0.484 |
| GLIPR1       | 1.6          | 0.001   | 0.437 | MIR520F      | -1.6         | 0.003   | 0.442 |
| MS4A4A       | 1.6          | 0.002   | 0.437 | LINC02304    | -1.6         | 0.000   | 0.430 |
| PLEKHF1      | 1.6          | 0.002   | 0.437 | GAS1RR       | -1.6         | 0.001   | 0.437 |
| LOC105370765 | 1.6          | 0.001   | 0.437 | PLA2G2C      | -1.6         | 0.000   | 0.430 |
| P2RY12       | 1.7          | 0.001   | 0.437 | PABPC1L2A    | -1.6         | 0.004   | 0.463 |
| NLRC4        | 1.7          | 0.000   | 0.430 | FTH1         | -1.6         | 0.001   | 0.437 |
| CD96         | 1.7          | 0.002   | 0.442 | TRAV8-7      | -1.5         | 0.002   | 0.437 |
| IGKV4-1      | 1.7          | 0.000   | 0.430 | LOC107985285 | -1.5         | 0.001   | 0.437 |
| LCP1         | 1.7          | 0.005   | 0.482 | LINC01664    | -1.5         | 0.002   | 0.437 |

|              |     |       |       |              |      |       |       |
|--------------|-----|-------|-------|--------------|------|-------|-------|
| LINC01948    | 1.7 | 0.002 | 0.437 | LOC105376395 | -1.5 | 0.005 | 0.482 |
| P2RY13       | 1.7 | 0.003 | 0.451 | C11orf87     | -1.5 | 0.004 | 0.463 |
| FABP3        | 1.7 | 0.001 | 0.437 | MIR3178      | -1.5 | 0.001 | 0.437 |
| GFRA2        | 1.7 | 0.001 | 0.437 | VCX3B        | -1.5 | 0.003 | 0.463 |
| LOC441239    | 1.7 | 0.004 | 0.463 | PHACTR3      | -1.5 | 0.002 | 0.437 |
| ITGB7        | 1.7 | 0.000 | 0.430 | LOC102724589 | -1.5 | 0.001 | 0.437 |
| RHEX         | 1.7 | 0.002 | 0.437 | C17orf98     | -1.5 | 0.002 | 0.437 |
| TRAJ4        | 1.8 | 0.004 | 0.463 | KLC3         | -1.5 | 0.001 | 0.436 |
| LOC105376287 | 1.8 | 0.001 | 0.437 | LINC01395    | -1.5 | 0.002 | 0.437 |
| SCN1A-AS1    | 1.8 | 0.001 | 0.437 | LOC105379010 | -1.5 | 0.004 | 0.463 |
| LRRN3        | 1.8 | 0.001 | 0.437 | LOC107984414 | -1.5 | 0.000 | 0.430 |
| TRBJ2-3      | 1.8 | 0.002 | 0.437 |              |      |       |       |
| SLAMF1       | 1.8 | 0.002 | 0.437 |              |      |       |       |
| GPR155       | 1.8 | 0.000 | 0.430 |              |      |       |       |
| ITK          | 1.8 | 0.001 | 0.437 |              |      |       |       |
| ANKRD30B     | 1.8 | 0.004 | 0.463 |              |      |       |       |
| IGKV1-5      | 1.8 | 0.002 | 0.437 |              |      |       |       |
| BTLA         | 1.8 | 0.002 | 0.437 |              |      |       |       |
| KIRREL1-IT1  | 1.8 | 0.000 | 0.430 |              |      |       |       |
| FAM30A       | 1.8 | 0.003 | 0.463 |              |      |       |       |
| GPR171       | 1.8 | 0.001 | 0.437 |              |      |       |       |
| LOC107986412 | 1.9 | 0.000 | 0.430 |              |      |       |       |
| IGKV3-11     | 1.9 | 0.001 | 0.437 |              |      |       |       |
| LILRB4       | 1.9 | 0.001 | 0.437 |              |      |       |       |
| LRRC37B      | 1.9 | 0.002 | 0.437 |              |      |       |       |
| MIR3161      | 1.9 | 0.001 | 0.437 |              |      |       |       |
| LOC105372733 | 2.0 | 0.000 | 0.430 |              |      |       |       |
| PPP1R16B     | 2.0 | 0.000 | 0.430 |              |      |       |       |
| RNY1P11      | 2.0 | 0.004 | 0.463 |              |      |       |       |
| IGLV9-49     | 2.0 | 0.002 | 0.437 |              |      |       |       |
| MIR181A1HG   | 2.0 | 0.004 | 0.464 |              |      |       |       |
| TRAT1        | 2.0 | 0.002 | 0.437 |              |      |       |       |
| MIR4774      | 2.0 | 0.004 | 0.463 |              |      |       |       |
| ZNF382       | 2.1 | 0.003 | 0.463 |              |      |       |       |
| TRGV10       | 2.1 | 0.001 | 0.437 |              |      |       |       |
| ZIM2         | 2.2 | 0.000 | 0.430 |              |      |       |       |
| TRBV20-1     | 2.3 | 0.002 | 0.437 |              |      |       |       |
| LINC02211    | 2.3 | 0.000 | 0.430 |              |      |       |       |
| TRAJ40       | 2.3 | 0.005 | 0.484 |              |      |       |       |
| IGHV1-18     | 2.4 | 0.005 | 0.484 |              |      |       |       |

*No individual genes were significantly differentially expressed (FDR<0.05). FDR- False discovery rate.*

**Table S7: Differentially expressed genes when comparing the allogenic group to the autologous group eight weeks after FMT (baseline-corrected).** Genes with a fold change >1.5 and < -1.5 and p<0.005 are shown.

| Increased    |              |         |       | Decreased    |              |         |       |
|--------------|--------------|---------|-------|--------------|--------------|---------|-------|
| Gene name    | Fold changes | p-value | FDR   | Gene name    | Fold changes | p-value | FDR   |
| ARHGAP15     | 1.5          | 0.0044  | 0.406 | OLFM4        | -5.0         | 0.0008  | 0.300 |
| GMFG         | 1.5          | 0.0038  | 0.395 | LOC107985377 | -4.0         | 0.0000  | 0.062 |
| MXRA5        | 1.5          | 0.0001  | 0.182 | SPINK4       | -3.6         | 0.0027  | 0.372 |
| TRAM1L1      | 1.5          | 0.0013  | 0.324 | REG4         | -3.3         | 0.0001  | 0.183 |
| KHDRBS2      | 1.5          | 0.0040  | 0.396 | LOC105374334 | -3.1         | 0.0002  | 0.215 |
| GIMAP7       | 1.5          | 0.0037  | 0.395 | LOC644277    | -2.6         | 0.0016  | 0.324 |
| LOC112268039 | 1.5          | 0.0032  | 0.386 | MIR4746      | -2.5         | 0.0006  | 0.281 |
| FAM126A      | 1.5          | 0.0011  | 0.320 | C9orf106     | -2.4         | 0.0009  | 0.300 |
| ADPGK-AS1    | 1.5          | 0.0010  | 0.306 | LOC105369187 | -2.4         | 0.0031  | 0.386 |
| LOC284581    | 1.5          | 0.0044  | 0.406 | LOC101927960 | -2.3         | 0.0026  | 0.364 |
| MZB1         | 1.5          | 0.0024  | 0.346 | LOC101927851 | -2.2         | 0.0024  | 0.347 |
| P2RY12       | 1.5          | 0.0045  | 0.412 | TFF1         | -2.1         | 0.0001  | 0.182 |
| ZNF431       | 1.5          | 0.0010  | 0.306 | LAGE3        | -2.1         | 0.0018  | 0.333 |
| NOX4         | 1.5          | 0.0020  | 0.337 | RPL39L       | -2.0         | 0.0024  | 0.346 |
| TXK          | 1.5          | 0.0043  | 0.406 | GSDME        | -1.9         | 0.0021  | 0.337 |
| NA           | 1.5          | 0.0043  | 0.406 | LOC101929976 | -1.9         | 0.0011  | 0.320 |
| JAML         | 1.5          | 0.0004  | 0.230 | ARHGEF39     | -1.8         | 0.0005  | 0.264 |
| SLC14A2      | 1.5          | 0.0028  | 0.376 | GNMT         | -1.8         | 0.0015  | 0.324 |
| RNU6-744P    | 1.5          | 0.0048  | 0.416 | LOC107984461 | -1.8         | 0.0008  | 0.300 |
| LRRK2        | 1.5          | 0.0014  | 0.324 | MIR3190      | -1.8         | 0.0031  | 0.386 |
| C14orf132    | 1.5          | 0.0009  | 0.300 | FNDC10       | -1.8         | 0.0002  | 0.196 |
| LAPTM5       | 1.5          | 0.0035  | 0.390 | IQGAP3       | -1.7         | 0.0040  | 0.396 |
| SORCS1       | 1.5          | 0.0020  | 0.337 | TPSG1        | -1.7         | 0.0001  | 0.196 |
| CCDC69       | 1.5          | 0.0007  | 0.300 | ITLN1        | -1.7         | 0.0023  | 0.346 |
| PIP4K2A      | 1.5          | 0.0002  | 0.196 | LOC107986870 | -1.7         | 0.0019  | 0.337 |
| TMEM183A     | 1.6          | 0.0020  | 0.337 | PDGFRL       | -1.7         | 0.0016  | 0.324 |
| KCNQ5-IT1    | 1.6          | 0.0016  | 0.325 | EP300-AS1    | -1.7         | 0.0027  | 0.372 |
| INHBE        | 1.6          | 0.0013  | 0.324 | KIF18B       | -1.7         | 0.0032  | 0.386 |
| RPS15AP10    | 1.6          | 0.0005  | 0.264 | PCAT29       | -1.7         | 0.0008  | 0.300 |
| ARHGAP25     | 1.6          | 0.0046  | 0.414 | LOC105370772 | -1.7         | 0.0000  | 0.088 |
| TM6SF1       | 1.6          | 0.0031  | 0.386 | SLPI         | -1.7         | 0.0000  | 0.158 |
| ATP6V1C2     | 1.6          | 0.0008  | 0.300 | TMEM125      | -1.7         | 0.0001  | 0.183 |
| NCKAP1L      | 1.6          | 0.0019  | 0.337 | LINC02089    | -1.6         | 0.0021  | 0.337 |
| ZNF571-AS1   | 1.6          | 0.0048  | 0.416 | LOC105373728 | -1.6         | 0.0049  | 0.420 |
| CD226        | 1.6          | 0.0021  | 0.337 | ALDH1L1      | -1.6         | 0.0015  | 0.324 |
| ST8SIA4      | 1.6          | 0.0014  | 0.324 | ACY3         | -1.6         | 0.0003  | 0.229 |
| ZNF197-AS1   | 1.6          | 0.0009  | 0.300 | LINC02408    | -1.6         | 0.0039  | 0.395 |
| IGKJ3        | 1.6          | 0.0021  | 0.337 | LOC105375172 | -1.6         | 0.0028  | 0.378 |
| NFYC-AS1     | 1.6          | 0.0045  | 0.411 | LOC105376433 | -1.6         | 0.0018  | 0.333 |
| IGHM         | 1.6          | 0.0005  | 0.264 | FAHD2A       | -1.6         | 0.0037  | 0.395 |
| KANSL1-AS1   | 1.6          | 0.0002  | 0.196 | CEACAM16     | -1.6         | 0.0004  | 0.230 |
| LOC105379012 | 1.6          | 0.0003  | 0.229 | VPREB1       | -1.6         | 0.0035  | 0.390 |
| PLCG2        | 1.6          | 0.0022  | 0.343 | LOC105376434 | -1.6         | 0.0024  | 0.347 |
| LOC105369759 | 1.6          | 0.0009  | 0.300 | LINC00159    | -1.6         | 0.0022  | 0.343 |
| CST7         | 1.6          | 0.0014  | 0.324 | LOC105372330 | -1.6         | 0.0016  | 0.325 |
| OR52W1       | 1.6          | 0.0023  | 0.346 | LOC102723539 | -1.6         | 0.0038  | 0.395 |
| LOC101928202 | 1.6          | 0.0015  | 0.324 | CRIM1-DT     | -1.6         | 0.0013  | 0.324 |
| LINC01563    | 1.6          | 0.0031  | 0.386 | KLK1         | -1.6         | 0.0003  | 0.229 |
| DTHD1        | 1.6          | 0.0006  | 0.281 | ASRGL1       | -1.5         | 0.0015  | 0.324 |
| ANKRD36BP2   | 1.6          | 0.0003  | 0.229 | LOC401040    | -1.5         | 0.0017  | 0.327 |

|              |     |        |       |              |      |        |       |
|--------------|-----|--------|-------|--------------|------|--------|-------|
| MIAT         | 1.6 | 0.0035 | 0.390 | MRAP2        | -1.5 | 0.0032 | 0.386 |
| COLQ         | 1.6 | 0.0042 | 0.401 | GDPD3        | -1.5 | 0.0012 | 0.323 |
| MIR1231      | 1.6 | 0.0009 | 0.300 | LOC105374454 | -1.5 | 0.0042 | 0.401 |
| LYPD3        | 1.6 | 0.0009 | 0.300 | LOC105375074 | -1.5 | 0.0046 | 0.413 |
| PAN3-AS1     | 1.6 | 0.0003 | 0.230 | GSTM2P1      | -1.5 | 0.0041 | 0.397 |
| APBB1IP      | 1.6 | 0.0047 | 0.416 | THEM6        | -1.5 | 0.0018 | 0.333 |
| LOC374443    | 1.6 | 0.0039 | 0.395 | ENTPD3-AS1   | -1.5 | 0.0021 | 0.337 |
| IGHG2        | 1.6 | 0.0033 | 0.388 | IL9R         | -1.5 | 0.0032 | 0.386 |
| IGHJ2        | 1.6 | 0.0000 | 0.158 |              |      |        |       |
| IGHV3-23     | 1.6 | 0.0021 | 0.337 |              |      |        |       |
| RNU6-1048P   | 1.6 | 0.0015 | 0.324 |              |      |        |       |
| LINC02531    | 1.6 | 0.0047 | 0.416 |              |      |        |       |
| LDOC1        | 1.6 | 0.0022 | 0.339 |              |      |        |       |
| LAX1         | 1.6 | 0.0020 | 0.337 |              |      |        |       |
| MIR514B      | 1.6 | 0.0017 | 0.333 |              |      |        |       |
| IGKV1-17     | 1.6 | 0.0004 | 0.235 |              |      |        |       |
| LINC01948    | 1.6 | 0.0039 | 0.395 |              |      |        |       |
| IL10         | 1.6 | 0.0003 | 0.229 |              |      |        |       |
| IGKV2D-24    | 1.7 | 0.0017 | 0.333 |              |      |        |       |
| ZNF300P1     | 1.7 | 0.0015 | 0.324 |              |      |        |       |
| LOC101928721 | 1.7 | 0.0004 | 0.230 |              |      |        |       |
| RASGRP1      | 1.7 | 0.0005 | 0.264 |              |      |        |       |
| ACTR3-AS1    | 1.7 | 0.0013 | 0.324 |              |      |        |       |
| SCN1A-AS1    | 1.7 | 0.0021 | 0.337 |              |      |        |       |
| GFRA2        | 1.7 | 0.0009 | 0.300 |              |      |        |       |
| ST3GAL6      | 1.7 | 0.0012 | 0.322 |              |      |        |       |
| CCDC141      | 1.7 | 0.0038 | 0.395 |              |      |        |       |
| LOC105372733 | 1.7 | 0.0020 | 0.337 |              |      |        |       |
| GPR15        | 1.7 | 0.0003 | 0.224 |              |      |        |       |
| LCP1         | 1.7 | 0.0034 | 0.388 |              |      |        |       |
| CD38         | 1.7 | 0.0037 | 0.395 |              |      |        |       |
| STK33        | 1.7 | 0.0033 | 0.388 |              |      |        |       |
| LINC02189    | 1.7 | 0.0009 | 0.300 |              |      |        |       |
| EMB          | 1.7 | 0.0003 | 0.224 |              |      |        |       |
| LOC100507599 | 1.7 | 0.0005 | 0.264 |              |      |        |       |
| CD96         | 1.7 | 0.0012 | 0.323 |              |      |        |       |
| CD27         | 1.8 | 0.0002 | 0.197 |              |      |        |       |
| THEMIS       | 1.8 | 0.0045 | 0.411 |              |      |        |       |
| MEOX2        | 1.8 | 0.0011 | 0.317 |              |      |        |       |
| DISC1        | 1.8 | 0.0015 | 0.324 |              |      |        |       |
| CCL18        | 1.8 | 0.0033 | 0.388 |              |      |        |       |
| IGHV3-72     | 1.8 | 0.0007 | 0.300 |              |      |        |       |
| IGKV1-5      | 1.8 | 0.0024 | 0.346 |              |      |        |       |
| TRBC2        | 1.8 | 0.0040 | 0.396 |              |      |        |       |
| PTPRC        | 1.8 | 0.0016 | 0.324 |              |      |        |       |
| RASSF2       | 1.8 | 0.0001 | 0.183 |              |      |        |       |
| IGKV4-1      | 1.8 | 0.0001 | 0.182 |              |      |        |       |
| GPR171       | 1.8 | 0.0011 | 0.317 |              |      |        |       |
| TIFAB        | 1.8 | 0.0006 | 0.281 |              |      |        |       |
| IGLV1-40     | 1.9 | 0.0022 | 0.339 |              |      |        |       |
| TRAJ35       | 1.9 | 0.0035 | 0.390 |              |      |        |       |
| TRAJ47       | 1.9 | 0.0032 | 0.386 |              |      |        |       |
| LOC105375724 | 1.9 | 0.0049 | 0.420 |              |      |        |       |
| ITGB7        | 1.9 | 0.0000 | 0.169 |              |      |        |       |
| BTLA         | 1.9 | 0.0011 | 0.317 |              |      |        |       |
| TRAJ6        | 1.9 | 0.0021 | 0.337 |              |      |        |       |

|              |     |        |       |  |  |  |  |
|--------------|-----|--------|-------|--|--|--|--|
| IKZF3        | 1.9 | 0.0023 | 0.346 |  |  |  |  |
| TRAV8-4      | 1.9 | 0.0018 | 0.333 |  |  |  |  |
| MIR3115      | 2.0 | 0.0017 | 0.333 |  |  |  |  |
| LILRB4       | 2.0 | 0.0003 | 0.230 |  |  |  |  |
| IGKV3-7      | 2.0 | 0.0001 | 0.183 |  |  |  |  |
| PPP1R16B     | 2.0 | 0.0002 | 0.197 |  |  |  |  |
| IGKV3-11     | 2.0 | 0.0004 | 0.232 |  |  |  |  |
| TRAJ10       | 2.0 | 0.0015 | 0.324 |  |  |  |  |
| LRRC37B      | 2.0 | 0.0006 | 0.281 |  |  |  |  |
| POU2AF1      | 2.0 | 0.0014 | 0.324 |  |  |  |  |
| TNXB         | 2.0 | 0.0006 | 0.264 |  |  |  |  |
| LOC105371264 | 2.0 | 0.0031 | 0.386 |  |  |  |  |
| LINC02211    | 2.1 | 0.0019 | 0.337 |  |  |  |  |
| TRAJ38       | 2.1 | 0.0048 | 0.416 |  |  |  |  |
| ALG10B       | 2.1 | 0.0014 | 0.324 |  |  |  |  |
| ITK          | 2.2 | 0.0000 | 0.158 |  |  |  |  |
| IGLV3-21     | 2.2 | 0.0005 | 0.264 |  |  |  |  |
| LOC105371932 | 2.2 | 0.0001 | 0.182 |  |  |  |  |
| RHOQ         | 2.2 | 0.0037 | 0.395 |  |  |  |  |
| SPAG5-AS1    | 2.3 | 0.0015 | 0.324 |  |  |  |  |
| TRAV29DV5    | 2.3 | 0.0010 | 0.306 |  |  |  |  |
| CGB8         | 2.3 | 0.0005 | 0.264 |  |  |  |  |
| LOC107986275 | 2.3 | 0.0001 | 0.182 |  |  |  |  |
| TRAT1        | 2.4 | 0.0002 | 0.197 |  |  |  |  |
| FAM209A      | 2.5 | 0.0035 | 0.390 |  |  |  |  |
| RNY1P11      | 2.7 | 0.0001 | 0.183 |  |  |  |  |
| LOC105369151 | 3.7 | 0.0001 | 0.183 |  |  |  |  |

*No individual genes were significantly differentially expressed (FDR<0.05). FDR- False discovery rate.*

## A. Allogenic versus autologous FMT (two weeks after)

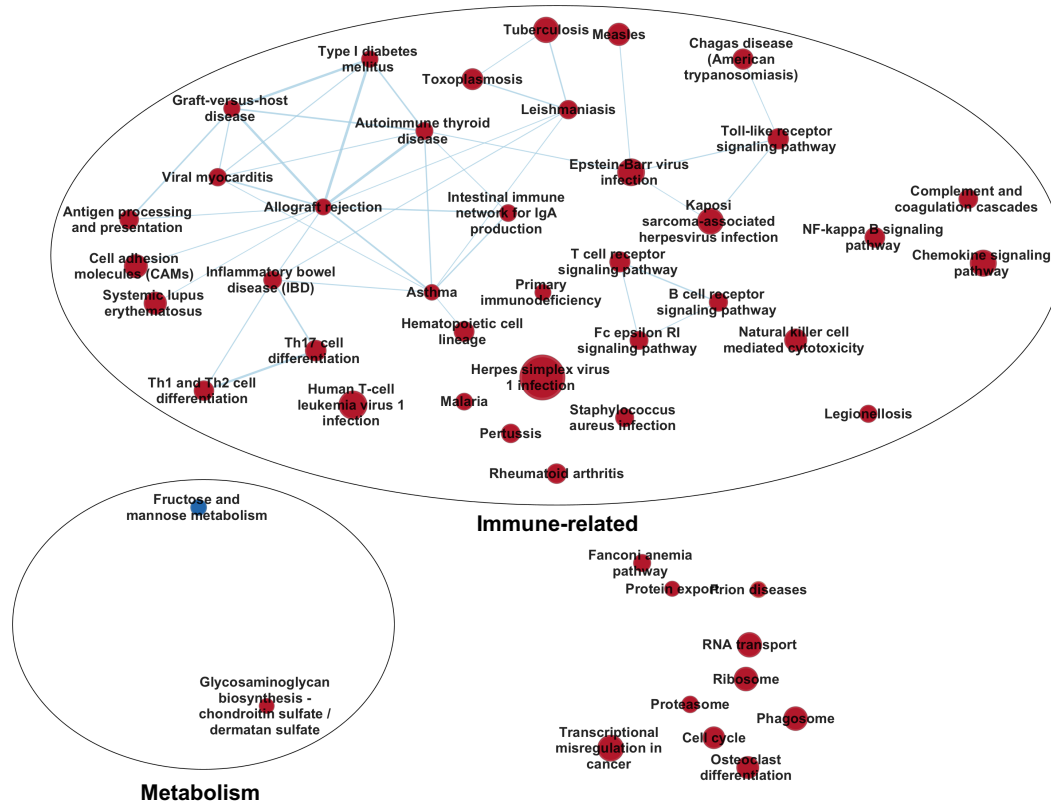

## B. Allogenic FMT (two weeks after vs baseline)

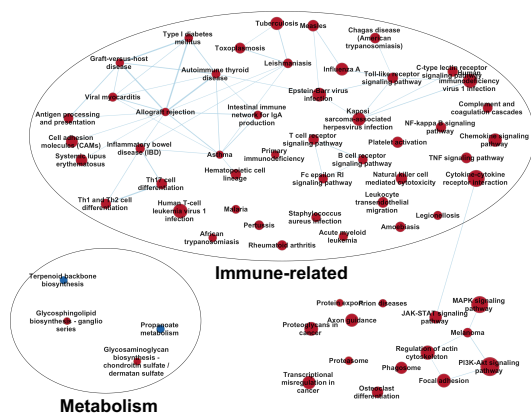

## C. Autologous FMT (two weeks after vs baseline)

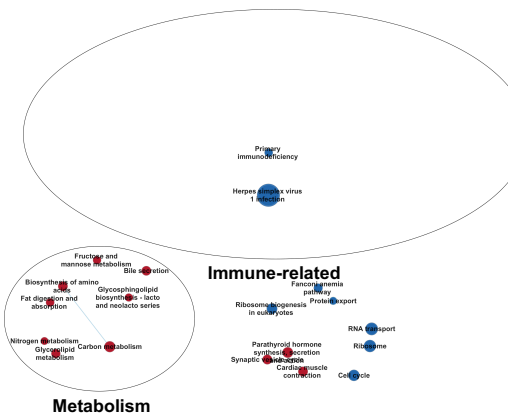

**Figure S1: Enrichment maps (including gene set names) of gene sets changed two weeks after FMT.** A. Allogenic versus autologous FMT (baseline-corrected). B. Allogenic FMT (within-group comparison). C. Autologous FMT (within-group comparison). Nodes represent KEGG gene sets and the edges between the nodes represent their similarity. Red nodes indicate enriched (increased expression of) gene sets and blue nodes indicate suppressed (decreased expression of) gene sets. Node size represents the number of genes in the gene set, and the thickness of the edges indicates the degree of overlap between the two connected gene sets (nodes). The gene sets are manually grouped according to their biological functions among these gene sets.

## A. Allogenic versus autologous FMT (eight weeks after)

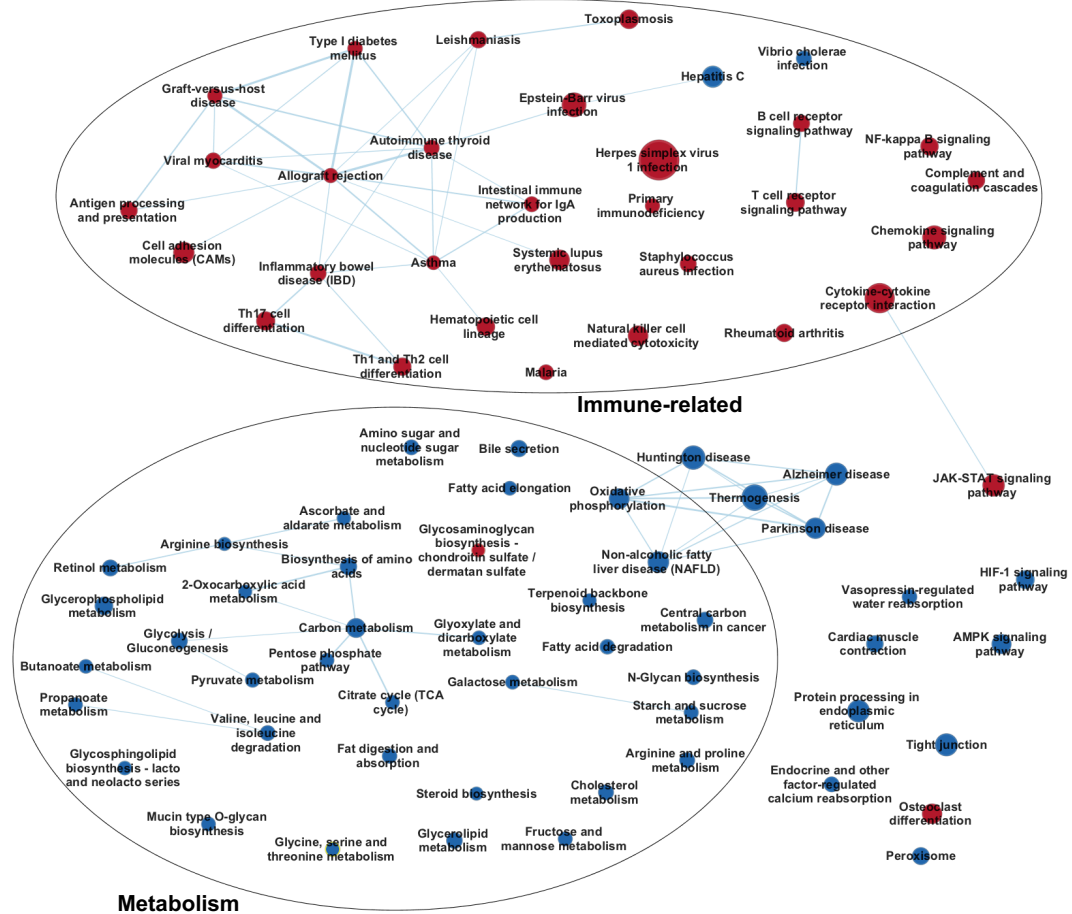

## B. Allogenic FMT (eight weeks after vs baseline)

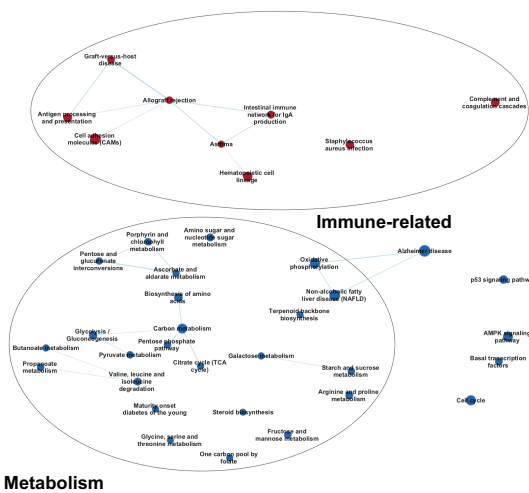

## C. Autologous FMT (eight weeks after vs baseline)

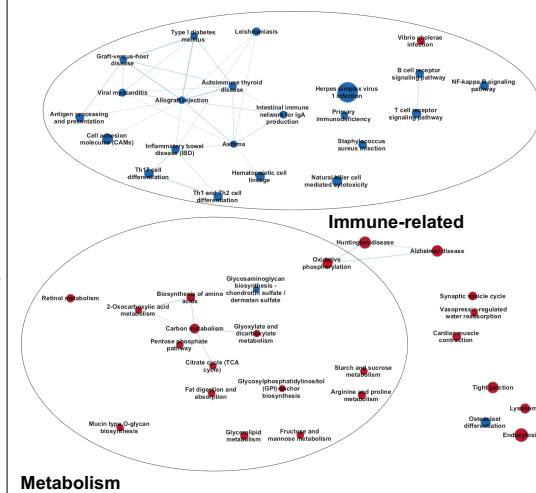

**Figure S2: Enrichment maps (including gene set names) of gene sets changed eight weeks after FMT.** A. Allogenic versus autologous FMT (baseline-corrected). B. Allogenic FMT (within-group comparison). C. Autologous FMT (within-group comparison). Nodes represent KEGG gene sets and the edges between the nodes represent their similarity. Red nodes indicate enriched (increased expression of) gene sets and blue nodes indicate suppressed (decreased expression of) gene sets. Node size represents the number of genes in the gene set, and the thickness of the edges indicates the degree of overlap between the two connected gene sets (nodes). The gene sets are manually grouped according to their biological functions among these gene sets.

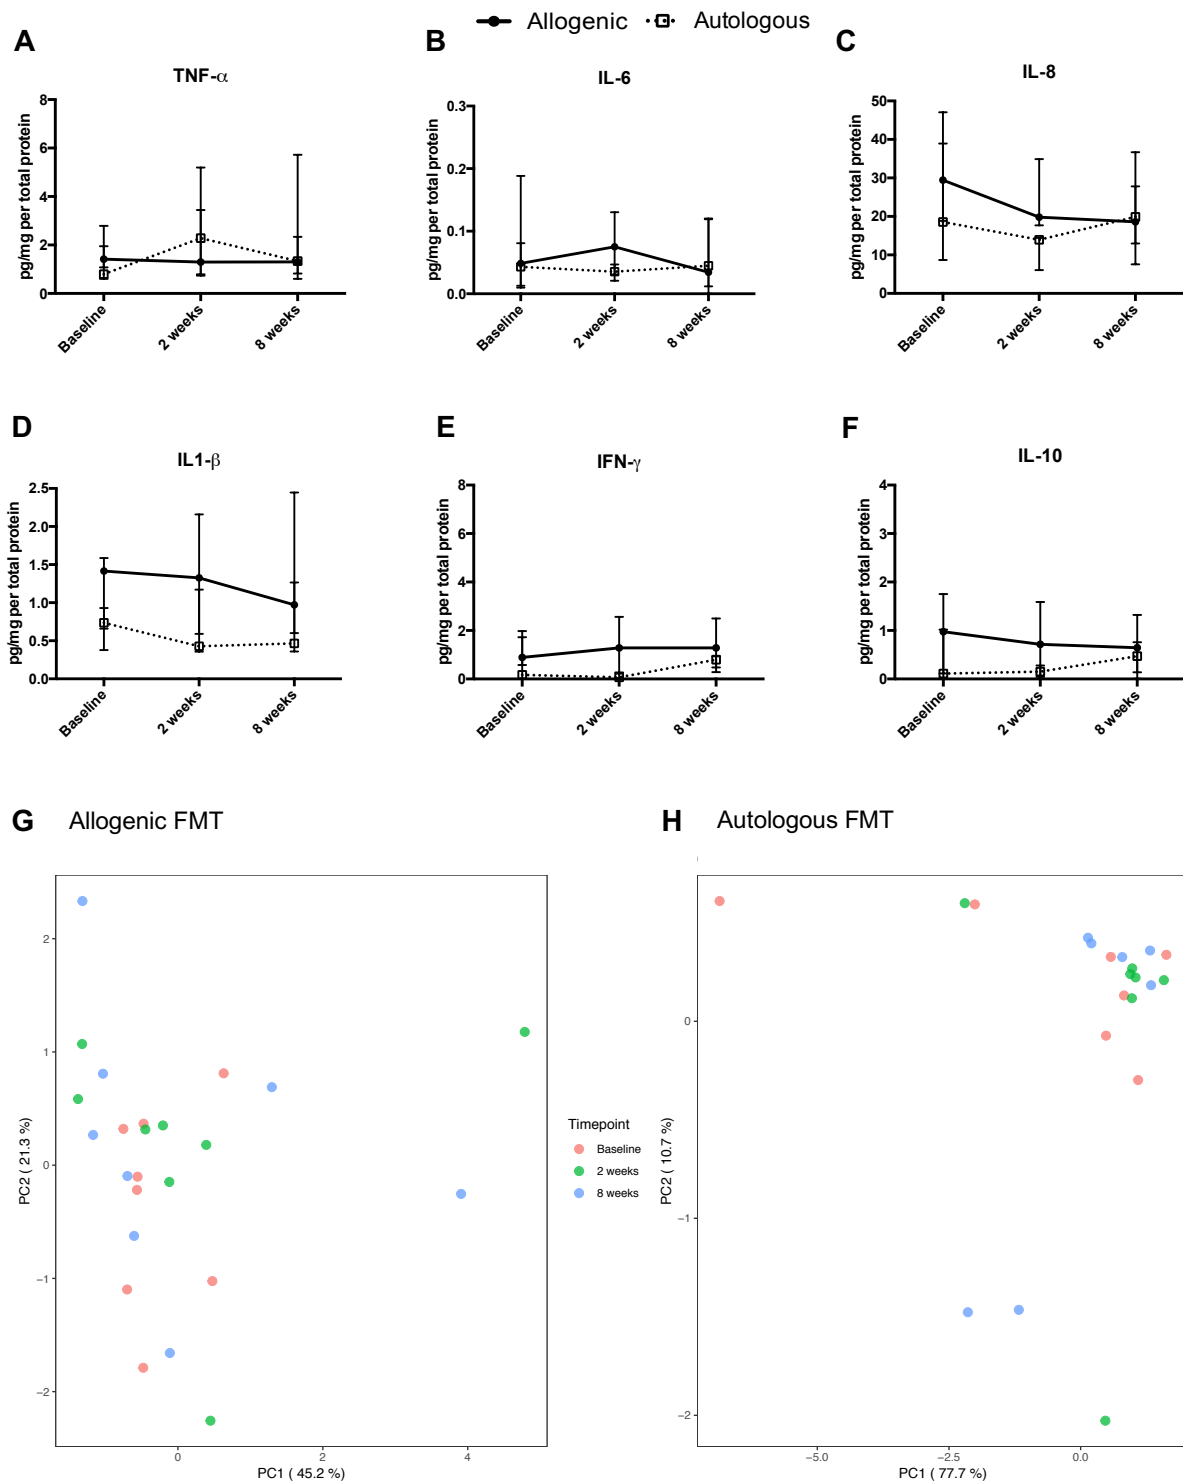

**Figure S3: Mucosal cytokine analysis.** A-F shows the univariate analysis, median with interquartile range are depicted. G, H shows the multivariate analysis (PCA, principal component analysis) in the allogenic FMT group (G) and the autologous FMT group (H).
